# Supplementary material for: Distribution of toxicity values across different species and modes of action of pesticides from PESTIMEP and PPDB databases
Source: Royal Society of Chemistry journal article supplement (doi:10.1039/c8tx00322j), 2019-01-01
Supplement: c8tx00322j1.pdf [file c8tx00322j1.pdf]

## **Distribution of toxicity values across different species and modes of action of pesticides from PESTIMEP and PPDB databases**

Abraham Madariaga-Mazon,\* Adriana Osnaya-Hernandez, Arni Chavez-Gomez, Juan Carlos García-Ramos,# Fernando Cortes-Guzman, Durbis Javier Castillo-Pazos, and Karina Martínez-Mayorga\*

Instituto de Química, Universidad Nacional Autónoma de México, Mexico City, Mexico

#*Current address:* CONACYT-UNAM-Centro de Nanociencias y Nanotecnología Km 107 Carretera Tijuana-Ensenada, B. C. Mexico.

### **SUPPORTING INFORMATION**

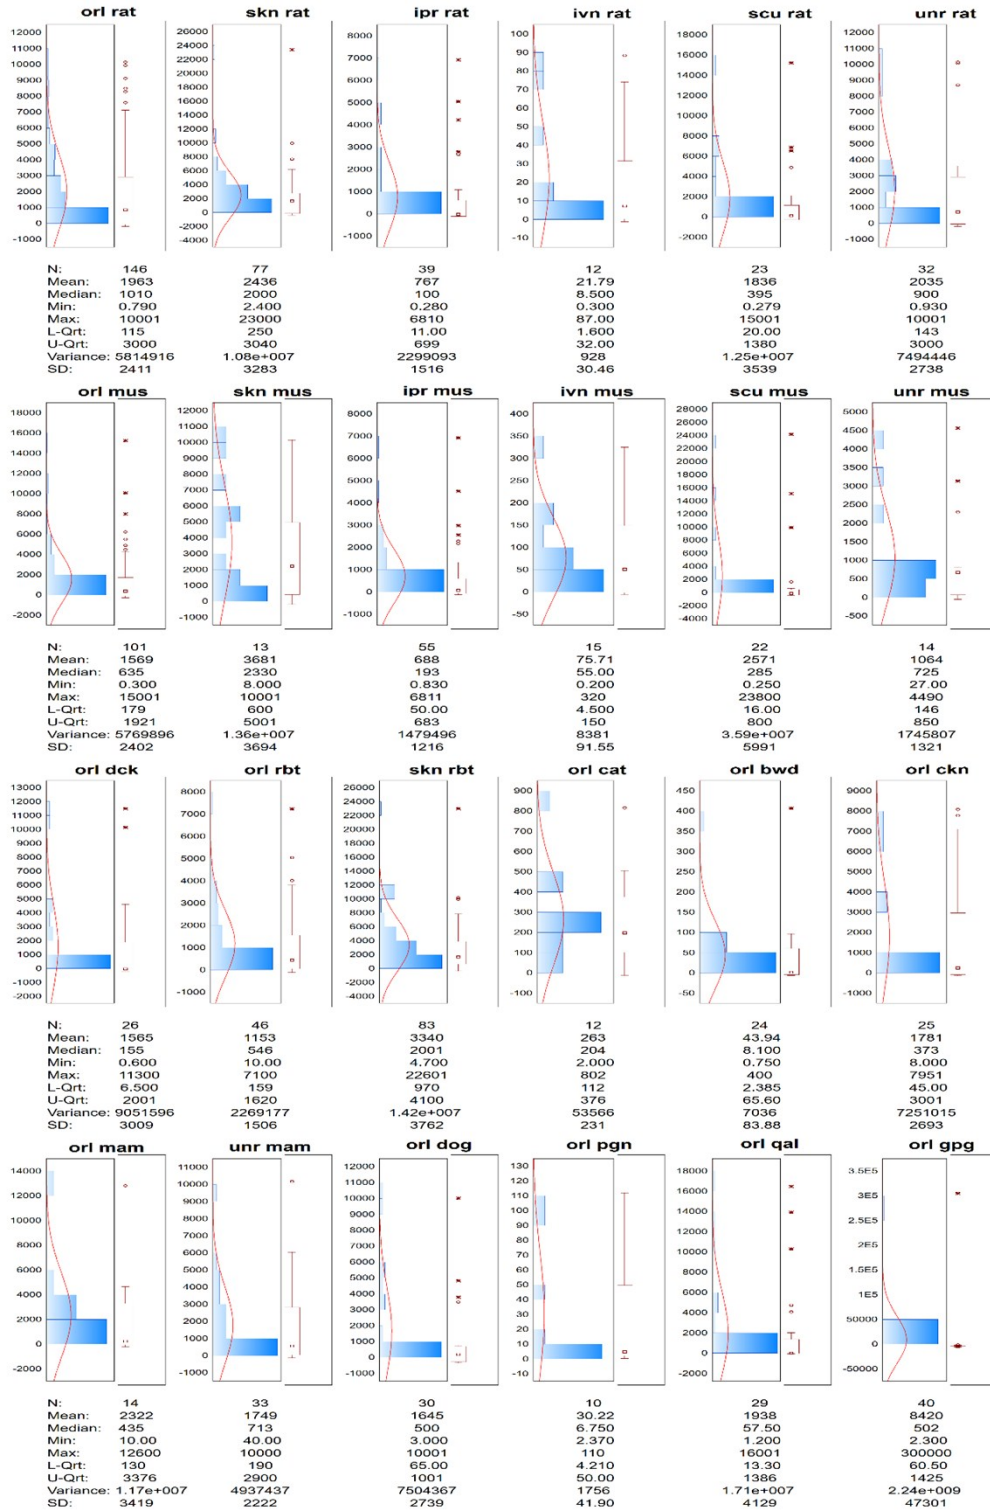

Figure S1. Distributions and descriptive statistics of toxicity endpoints and routes of exposure.

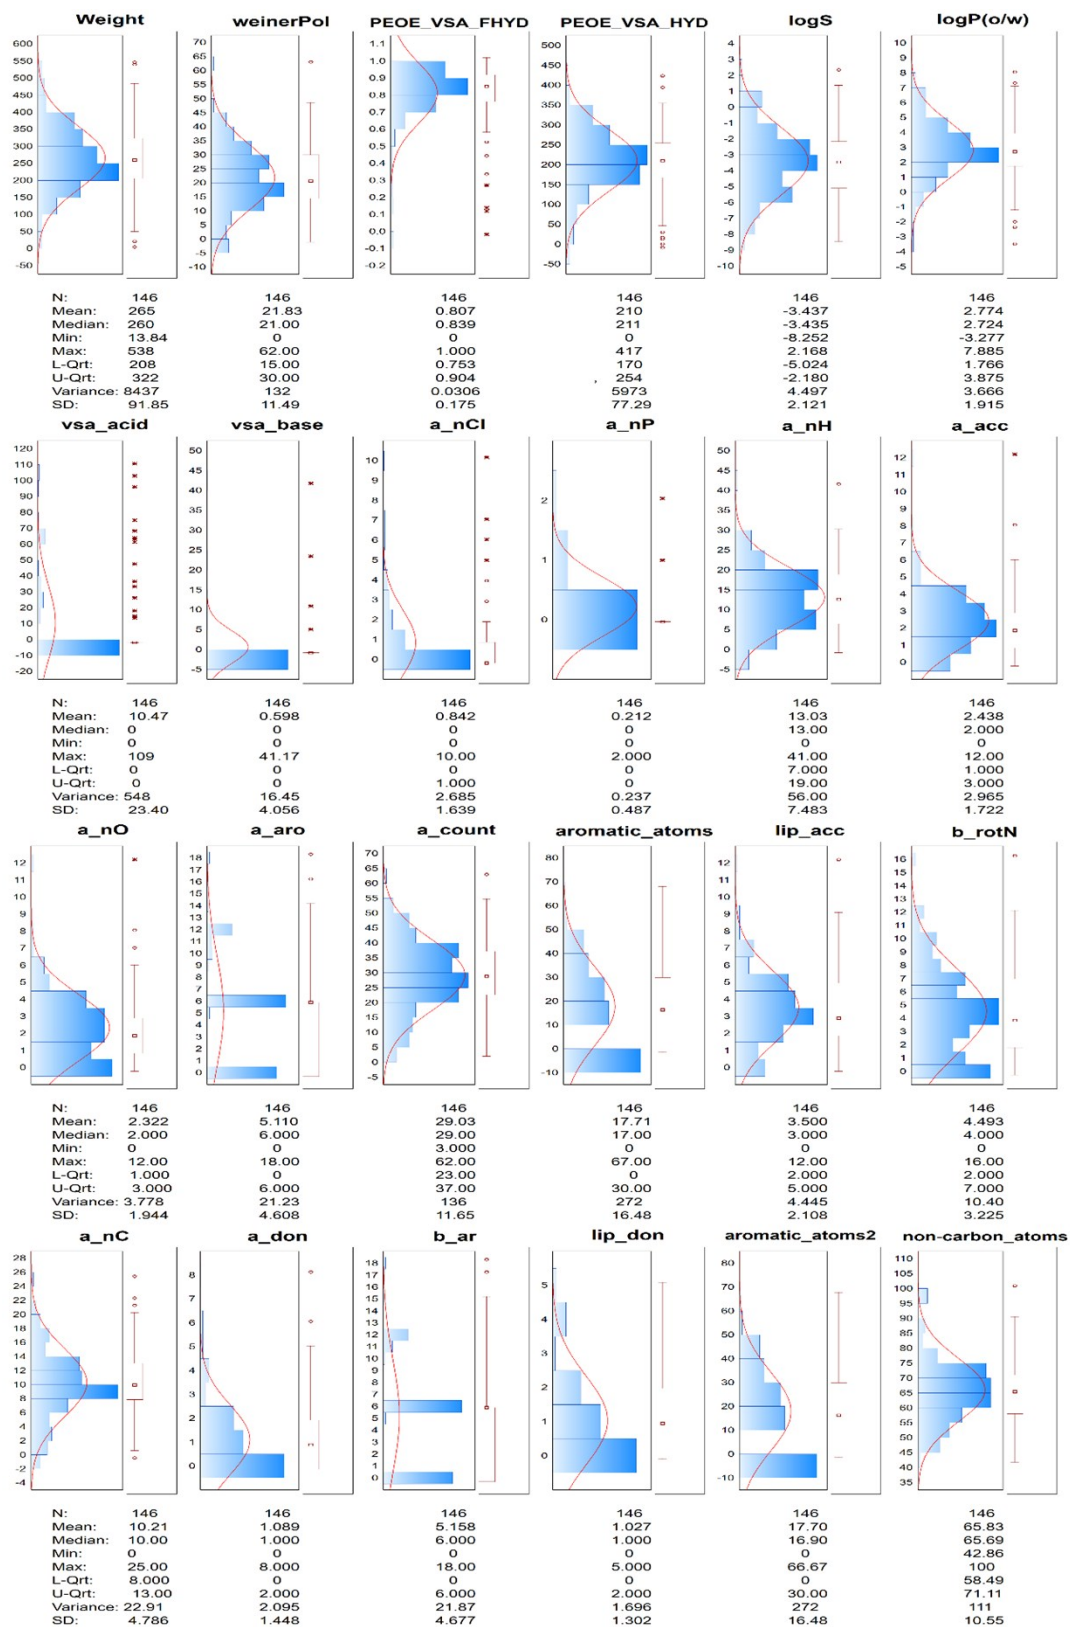

Figure S2. Distributions and descriptive statistics of physicochemical properties.

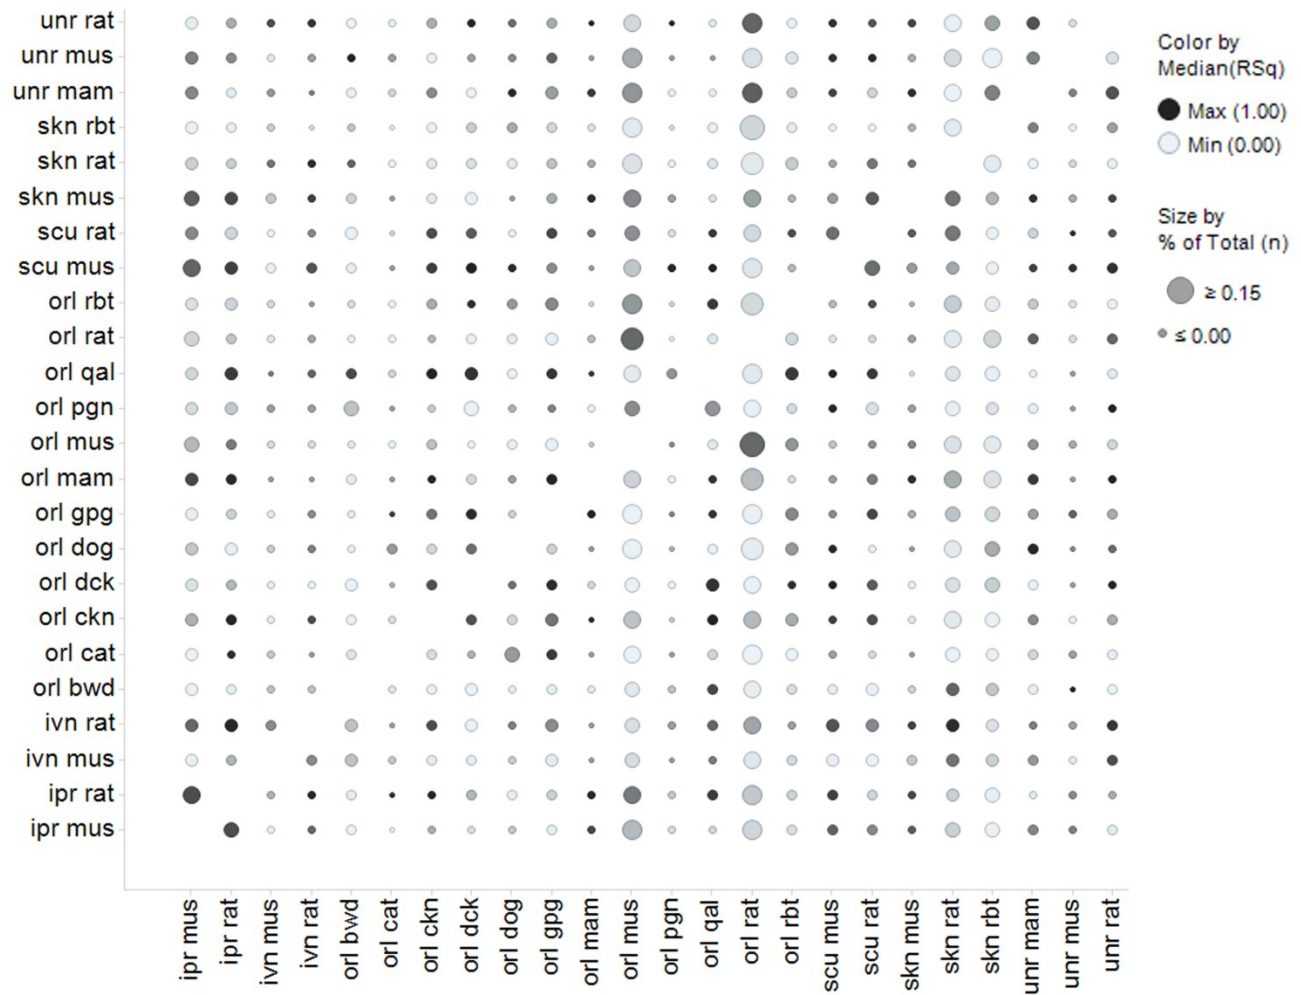

Figure S3. Graphical representation of the pair-wise linear regressions.

**Table S1. Number of molecules evaluated at a given experimental assay in PESTIMEP.**

|     |     | #molecules<br>evaluated |              |     | #molecules<br>evaluated |
|-----|-----|-------------------------|--------------|-----|-------------------------|
| rat | orl | 147                     | rbt          | scu | 2                       |
| mus | orl | 102                     | rbt          | unr | 2                       |
| rbt | skn | 85                      | ckn          | scu | 2                       |
| rat | skn | 77                      | ckn          | unr | 2                       |
| mus | ipr | 55                      | mky          | orl | 2                       |
| rbt | orl | 47                      | dog          | ipr | 2                       |
| gpg | orl | 40                      | dog          | ivn | 2                       |
| rat | ipr | 39                      | grb          | ipr | 2                       |
| rat | unr | 33                      | rat          | ro  | 1                       |
| mam | unr | 33                      | rat          | ihl | 1                       |
| dog | orl | 31                      | rat          | ice | 1                       |
| qal | orl | 29                      | rat          | itr | 1                       |
| dck | orl | 26                      | mus          | ice | 1                       |
| ckn | orl | 25                      | mus          | ims | 1                       |
| bwd | orl | 24                      | brd          | rec | 1                       |
| rat | scu | 23                      | prn          | orl | 1                       |
| mus | scu | 22                      | dcl          | skn | 1                       |
| mus | ivn | 17                      | rbt          | ipr | 1                       |
| mus | unr | 14                      | rbt          | ocu | 1                       |
| mam | orl | 14                      | cat          | skn | 1                       |
| mus | skn | 13                      | cat          | ipr | 1                       |
| rat | ivn | 12                      | cat          | unr | 1                       |
| cat | orl | 12                      | ctl          | unr | 1                       |
| pgn | orl | 10                      | bwd          | skn | 1                       |
| gpg | skn | 8                       | mam          | ipr | 1                       |
| dom | orl | 6                       | mam          | ivn | 1                       |
| gpg | ipr | 6                       | man          | orl | 1                       |
| rat | par | 5                       | man          | unr | 1                       |
| brd | orl | 5                       | dog          | scu | 1                       |
| dcl | orl | 5                       | dog          | unr | 1                       |
| qal | unr | 5                       | frg          | par | 1                       |
| ham | orl | 5                       | pgn          | ivn | 1                       |
| rbt | ivn | 4                       | qal          | skn | 1                       |
| rat | ims | 3                       | gpg          | ivn | 1                       |
| dck | skn | 3                       | gpg          | scu | 1                       |
| ctl | orl | 3                       | gpg          | unr | 1                       |
| mam | skn | 3                       | hmn          | orl | 1                       |
| ham | ipr | 3                       | hmn          | ims | 1                       |
| dck | unr | 2                       | trk          | orl | 1                       |
|     |     |                         | <b>TOTAL</b> |     | <b>1043</b>             |

**Table S2.** Coefficients of the first five principal components (PC) for the descriptors used in the PCA of FDA and pesticides databases based on druglike properties.

|                  | PC1     | PC2     | PC3     | PC4     | PC5     |
|------------------|---------|---------|---------|---------|---------|
| <b>Weight</b>    | 0.5005  | 0.37877 | 0.38767 | 0.27076 | 0.61841 |
| <b>logP(o/w)</b> | 0.09008 | 0.73269 | 0.3243  | 0.45241 | 0.38107 |
| <b>a_acc</b>     | 0.57605 | 0.16351 | 0.23975 | 0.36007 | 0.67401 |
| <b>a_don</b>     | 0.48082 | 0.3904  | 0.09341 | 0.76894 | 0.12809 |
| <b>b_rotN</b>    | 0.42233 | 0.3749  | 0.82361 | 0.03308 | 0.04064 |

**Table S3.** Coefficients of the first five principal components (PC) for the descriptors used in the PCA of FDA and pesticides databases based on pesticides properties.

|                         | PC1     | PC2     | PC3     | PC4     | PC5     |
|-------------------------|---------|---------|---------|---------|---------|
| <b>weinerPol</b>        | 0.49167 | 0.03691 | 0.03278 | 0.01893 | 0.03669 |
| <b>PEOE_VSA_HYD</b>     | 0.49457 | 0.03522 | 0.06162 | 0.05536 | 0.027   |
| <b>logS</b>             | 0.38326 | 0.29492 | 0.1884  | 0.04434 | 0.09114 |
| <b>vsa_acid</b>         | 0.0678  | 0.08849 | 0.535   | 0.37777 | 0.03307 |
| <b>vsa_base</b>         | 0.01779 | 0.02091 | 0.08505 | 0.48102 | 0.81922 |
| <b>reactive</b>         | 0.10514 | 0.18917 | 0.02127 | 0.62962 | 0.43812 |
| <b>a_nCl</b>            | 0.01923 | 0.27107 | 0.52827 | 0.41984 | 0.1817  |
| <b>a_nP</b>             | 0.0493  | 0.22789 | 0.59026 | 0.07161 | 0.20948 |
| <b>a_nH</b>             | 0.47037 | 0.16033 | 0.10665 | 0.10553 | 0.00578 |
| <b>a_nO</b>             | 0.30682 | 0.35848 | 0.0983  | 0.08317 | 0.15304 |
| <b>aromatic_carbons</b> | 0.02932 | 0.54181 | 0.0909  | 0.1568  | 0.15832 |
| <b>non-carbon_atoms</b> | 0.17818 | 0.54147 | 0.09459 | 0.00835 | 0.00518 |

**Table S4.** Coefficients of the first five principal components (PC) for the descriptors used in the PCA of FDA database based on pesticide-like properties.

|                         | PC1     | PC2     | PC3       | PC4     | PC5     |
|-------------------------|---------|---------|-----------|---------|---------|
| <b>weinerPol</b>        | 0.49169 | 0.02309 | 0.00239   | 0.00985 | 0.03329 |
| <b>PEOE_VSA_HYD</b>     | 0.49237 | 0.0582  | 0.02621   | 0.01769 | 0.10274 |
| <b>logS</b>             | 0.38701 | 0.31408 | 0.03046   | 0.08315 | 0.04462 |
| <b>vsa_acid</b>         | 0.00757 | 0.07779 | 0.69457   | 0.01738 | 0.05595 |
| <b>vsa_base</b>         | 0.01843 | 0.0399  | 0.68386   | 0.05414 | 0.22635 |
| <b>reactive</b>         | 0.1179  | 0.17753 | 0.17883   | 0.32065 | 0.75538 |
| <b>a_nCl</b>            | 0.00853 | 0.28609 | 0.02044   | 0.65445 | 0.17498 |
| <b>a_nP</b>             | 0.02878 | 0.22202 | 0.08704   | 0.65405 | 0.49698 |
| <b>a_nH</b>             | 0.47362 | 0.1387  | 0.02617   | 0.12285 | 0.06537 |
| <b>a_nO</b>             | 0.31814 | 0.3453  | 0.00273   | 0.05292 | 0.15136 |
| <b>aromatic_carbons</b> | 0.05073 | 0.53907 | 0.08727   | 0.0687  | 0.2268  |
| <b>non-carbon_atoms</b> | 0.15081 | 0.54595 | 0.0005131 | 0.08907 | 0.07184 |

**Table S5.** Coefficients of the first five principal components (PC) for the descriptors used in the PCA of pesticides database based on pesticide-like properties

|                         | <b>PC1</b> | <b>PC2</b> | <b>PC3</b> | <b>PC4</b> | <b>PC5</b> |
|-------------------------|------------|------------|------------|------------|------------|
| <b>weinerPol</b>        | 0.44496    | 0.21068    | 0.23106    | 0.07116    | 0.03227    |
| <b>PEOE_VSA_HYD</b>     | 0.46606    | 0.26846    | 0.1564     | 0.00613    | 0.06307    |
| <b>logS</b>             | 0.47727    | 0.03927    | 0.0082     | 0.12848    | 0.13119    |
| <b>vsa_acid</b>         | 0.14188    | 0.162      | 0.52858    | 0.12444    | 0.06178    |
| <b>vsa_base</b>         | 0.02329    | 0.0023     | 0.29726    | 0.40607    | 0.68288    |
| <b>reactive</b>         | 0.04135    | 0.07183    | 0.35611    | 0.42343    | 0.40731    |
| <b>a_nCl</b>            | 0.24258    | 0.21203    | 0.16629    | 0.55092    | 0.46392    |
| <b>a_nP</b>             | 0.04261    | 0.42465    | 0.061      | 0.15113    | 0.14369    |
| <b>a_nH</b>             | 0.21659    | 0.43166    | 0.3463     | 0.33674    | 0.10064    |
| <b>a_nO</b>             | 0.06281    | 0.46308    | 0.45549    | 0.05925    | 0.08189    |
| <b>aromatic_carbons</b> | 0.22933    | 0.37211    | 0.24671    | 0.37437    | 0.23596    |
| <b>non-carbon_atoms</b> | 0.41293    | 0.29336    | 0.08872    | 0.18788    | 0.1826     |
